# Supplementary material for: Fast Fourier single-pixel imaging via binary illumination
Source: PubMed Central journal article supplement (PMC5607233; doi:10.1038/s41598-017-12228-3), 2017-09-20
Supplement: 41598_2017_12228_MOESM1_ESM.pdf [file 41598_2017_12228_MOESM1_ESM.pdf]

# Fast Fourier single-pixel imaging via binary illumination: supplementary material

Zibang Zhang<sup>1</sup>, Xueying Wang<sup>1</sup>, Guoan Zheng<sup>2</sup>, and Jingang Zhong<sup>1,3,\*</sup>

<sup>1</sup>Department of Optoelectronic Engineering, Jinan University, Guangzhou, 510632, China

<sup>2</sup>Biomedical Engineering, University of Connecticut, Storrs, CT, 06269, USA

<sup>3</sup>Guangdong Provincial Key Laboratory of Optical Fiber Sensing and Communications, Jinan University, Guangzhou, 510632, China

\*[corresponding.tzjg@jnu.edu.cn](mailto:corresponding.tzjg@jnu.edu.cn)

## Supplementary Video S1

In this video we show the acquisition of a live scene using the proposed technique. The video is made up with a sequence of 167 reconstructed images. The frame rate is 10 and thus the duration of the video is ~17 seconds. The resolution of reconstructed images is  $256 \times 256$  pixels. Each image is reconstructed from 1,998 measurements and therefore the sampling ratio is ~2% (1,332 of  $256 \times 256$  complex-valued coefficients sampled in Fourier domain). No post processing has been applied to the reconstructed images.
